# Supplementary material for: Familial Exudative Vitreoretinopathy With and Without Pathogenic Variants of Norrin/β-Catenin Signaling Genes
Source: PubMed Central journal article supplement — Ophthalmol Sci. 2024 Mar 15;4(5):100514. doi: 10.1016/j.xops.2024.100514 (PMC11179410; doi:10.1016/j.xops.2024.100514), 2024-03-15
Supplement: mmc1.pdf [file mmc1.pdf]

**Table S1. Pathogenic variants in *FZD4* gene**

| Nucleotide change | Amino acid change | N. of families identified in this study | Minor allele frequency |           |                       | <i>In-silico</i> prediction |           |              |            |                       |           | Conserved domain | Associated phenotype | Known variant [reported in our earlier study] | Pathogenicity (evidenced criteria)*          |                           |
|-------------------|-------------------|-----------------------------------------|------------------------|-----------|-----------------------|-----------------------------|-----------|--------------|------------|-----------------------|-----------|------------------|----------------------|-----------------------------------------------|----------------------------------------------|---------------------------|
|                   |                   |                                         | gnomAD [27]            | HGVD [28] | TOMMO 3.5kJPN v2 [29] | GERP++ [33]                 | SIFT [34] | M-CAP [35]   | REVEL [36] | Polyphen2 HumDIV [37] | CADD [38] |                  |                      |                                               |                                              |                           |
| c.9G>A            | p.W3*             | 1                                       | NL                     | NL        | NL                    | 3.33                        | NA        | NA           | NA         | NA                    | NA        | 35.0             | NA                   | FEVR §                                        | No                                           | Pathogenic (PVS1+PM2+PP1) |
| c.80dupT          | p.L27Ffs*103      | 1                                       | NL                     | NL        | NL                    | NL                          | NA        | NA           | NA         | NA                    | NA        | NA               | NA                   | FEVR(AD)                                      | No                                           | Pathogenic (PVS1+PM2+PP1) |
| c.173A>C          | p.Y58S            | 2                                       | NL                     | NL        | NL                    | 4.80                        | 0.00<br>0 | 0.431        | 0.970      | 1.000                 | 31.0      | (CDD:<br>143557) | FEVR(AD)             | No                                            | Likely pathogenic (PM1+PM2+PM5+PP1+P2+PP3)   |                           |
| c.173A>G          | p.Y58C            | 1                                       | NL                     | NL        | NL                    | 4.80                        | 0.00<br>0 | 0.429        | 0.928      | 1.000                 | 32.0      | (CDD:<br>143557) | FEVR(DI)             | Yes                                           | Pathogenic (PS1+PM1+PM2+PP2+P3)              |                           |
| c.265G>T          | p.G89C            | 1                                       | NL                     | NL        | NL                    | 5.03                        | 0.02<br>9 | 0.279        | 0.809      | 1.000                 | 32.0      | (CDD:<br>143557) | FEVR(AD)             | No                                            | Likely pathogenic (PM1+PM2+PP2+PP3)          |                           |
| c.313A>G          | p.M105V           | 5                                       | NL                     | NL        | 0.0001                | 5.82                        | 0.00<br>0 | <u>0.020</u> | 0.551      | 0.793                 | 24.9      | (CDD:<br>143557) | FEVR(AD)             | [21]                                          | Pathogenic (PS1+PS3+PM1+PM2+PM5+PP1+PP2+PP3) |                           |
| c.326_328 del     | p.K109del         | 1                                       | NL                     | NL        | NL                    | NL                          | NA        | NA           | NA         | NA                    | NA        | (CDD:<br>143557) | FEVR(SP)             | No                                            | Likely pathogenic (PM1+PM2+PM4+PP2)          |                           |
| c.341T>C          | p.I114T           | 1                                       | NL                     | NL        | NL                    | 5.82                        | 0.00<br>0 | 1.000        | 0.851      | 1.000                 | 26.1      | (CDD:<br>143557) | FEVR(SP)             | No                                            | Likely pathogenic (PM1+PM2+PM5+PP2+P3)       |                           |
| c.380G>A          | p.R127H           | 1                                       | NL                     | 0.0004    | 0.0015                | 5.82                        | 0.00      | 0.132        | 0.559      | 0.984                 | 25.5      | (CDD::           | FEVR(AD)             | YES: ROP                                      | Pathogenic                                   |                           |

|                    |                  |   |    |        |        |      |             |       |              |       |      |         |            |      |                                       |                           |
|--------------------|------------------|---|----|--------|--------|------|-------------|-------|--------------|-------|------|---------|------------|------|---------------------------------------|---------------------------|
|                    |                  |   |    |        |        |      | 7           |       |              |       |      |         | 143557)    |      |                                       | (PS1+PM1+PM2+PP2+P<br>P3) |
| c.430A>C           | p.N144H          | 1 | NL | NL     | NL     | 5.82 | 0.00        | 1.000 | <u>0.449</u> | 0.843 | 24.1 | (CDD:   | FEVR(AD)   | No   | Likely pathogenic                     |                           |
|                    |                  |   |    |        |        |      | 0           |       |              |       |      | 143557) |            |      | (PM1+PM2+PP2+PP3)                     |                           |
| c.678G>T           | p.W226C          | 1 | NL | NL     | NL     | 5.74 | 0.01        | 1.000 | 0.832        | 1.000 | 32.0 | (CDD:   | FEVR(DI)   | No   | Likely pathogenic                     |                           |
|                    |                  |   |    |        |        |      | 0           |       |              |       |      | 144942) |            |      | (PM1+PM2+PM3+PM5+P<br>P2+PP3)         |                           |
| c.836_942<br>del   | p.R279Sfs*<br>24 | 1 | NL | NL     | NL     | NL   | NA          | NA    | NA           | NA    | NA   | NA      | FEVR(AD)   | No   | Pathogenic                            |                           |
|                    |                  |   |    |        |        |      |             |       |              |       |      |         |            |      | (PVS1+PM2+PP1)                        |                           |
| c.845G>A           | p.C282Y          | 1 | NL | NL     | NL     | 5.72 | 0.00        | 0.430 | 0.919        | 1.000 | 29.2 | (CDD:   | FEVR(AD)   | No   | Likely pathogenic                     |                           |
|                    |                  |   |    |        |        |      | 0           |       |              |       |      | 144942) |            |      | (PM1+PM2+PP1+PP2+P<br>P3)             |                           |
| c.957G>A           | p.W319*          | 1 | NL | NL     | NL     | 5.59 | NA          | NA    | NA           | NA    | 37.0 | NA      | FEVR(SP)   | [21] | Pathogenic                            |                           |
|                    |                  |   |    |        |        |      |             |       |              |       |      |         |            |      | (PVS1+PS2+PS3+PM2)                    |                           |
| c.1005G>C          | p.W335C          | 2 | NL | NL     | NL     | 5.59 | 0.00        | 0.170 | 0.755        | 1.000 | 32.0 | (CDD:   | FEVR(AD)   | [22] | Likely pathogenic                     |                           |
|                    |                  |   |    |        |        |      | 0           |       |              |       |      | 144942) |            |      | (PM1+PM2+PP1+PP2+P<br>P3)             |                           |
| c.1024A>G          | p.M342V          | 7 | NL | 0.0023 | 0.0001 | 5.59 | <u>0.17</u> | 0.045 | <u>0.157</u> | 0.636 | 22.3 | (CDD:   | FEVR(AD/SP | [22] | Likely pathogenic                     |                           |
|                    |                  |   |    |        |        |      | <u>0</u>    |       |              |       |      | 144942) | )          |      | (PM1+PM2+PM5+PP1+P<br>P2+PP3)         |                           |
| c.1159delC         | p.L387Sfs*<br>44 | 3 | NL | NL     | NL     | NL   | NA          | NA    | NA           | NA    | NA   | NA      | FEVR(AD)   | No   | Pathogenic                            |                           |
|                    |                  |   |    |        |        |      |             |       |              |       |      |         |            |      | (PVS1+PM2+PP1+PP3)                    |                           |
| c.1250G>A          | p.R417Q          | 5 | NL | NL     | NL     | 5.77 | 0.01        | 0.214 | 0.933        | 1.000 | 32.0 | (CDD:   | FEVR(AD)   | [21] | Pathogenic                            |                           |
|                    |                  |   |    |        |        |      | 0           |       |              |       |      | 144942) |            |      | (PS1+PS3+PM1+PM2+P<br>M5+PP1+PP2+PP3) |                           |
| c.1282_12<br>85del | p.D428Sfs*<br>2  | 2 | NL | NL     | NL     | NL   | NA          | NA    | NA           | NA    | NA   | NA      | FEVR(AD)   | Yes  | Pathogenic                            |                           |
|                    |                  |   |    |        |        |      |             |       |              |       |      |         |            |      | (PVS1+PS1+PM2)                        |                           |
| c.1400A>G          | p.Y467C          | 1 | NL | NL     | NL     | 3.46 | <u>0.17</u> | 0.099 | <u>0.492</u> | 0.837 | 19.9 | (CDD:   | FEVR(AD)   | No   | Likely pathogenic                     |                           |

|           |         |   |    |    |        |      |             |       |              |              |      |         |          |      |                   |                              |
|-----------|---------|---|----|----|--------|------|-------------|-------|--------------|--------------|------|---------|----------|------|-------------------|------------------------------|
|           |         |   |    |    |        |      | <u>0</u>    |       |              |              |      | 144942) |          |      |                   | (PM1+PM2+PP1+PP2+P3)         |
| c.1423G>C | p.A475P | 1 | NL | NL | 0.0003 | 6.06 | <u>0.07</u> | 0.055 | <u>0.396</u> | <u>0.020</u> | 23.0 | (CDD:   | FEVR(AD) | [41] | Likely pathogenic |                              |
|           |         |   |    |    |        |      | <u>0</u>    |       |              |              |      | 144942) |          |      |                   | (PM1+PM2+PP1+PP2)            |
| c.1463G>A | p.G488D | 1 | NL | NL | NL     | 5.91 | 0.00        | 0.380 | 0.967        | 1.000        | 29.4 | (CDD:   | FEVR(AD) | [21] | Pathogenic        |                              |
|           |         |   |    |    |        |      | 0           |       |              |              |      | 144942) |          |      |                   | (PS3+PM1+PM2+PM5+P1+PP2+PP3) |
| c.1488G>C | p.W496C | 1 | NL | NL | NL     | 6.06 | <u>0.03</u> | 0.164 | <u>0.437</u> | 0.987        | 32.0 | (CDD:   | FEVR(AD) | No   | Likely pathogenic |                              |
|           |         |   |    |    |        |      | <u>0</u>    |       |              |              |      | 144942) |          |      |                   | (PM1+PM2+PP1+PP2+P3)         |
| c.1511G>A | p.W504* | 1 | NL | NL | NL     | 5.27 | NA          | NA    | NA           | NA           | 39.0 | NA      | FEVR(AD) | No   | Pathogenic        |                              |
|           |         |   |    |    |        |      |             |       |              |              |      |         |          |      |                   | (PVS1+PM2+PP1)               |

Underlined values are indicated as "not deleterious" according to the cutoff values ([33]-[37]), AD, autosomal dominant; CDD, Conserved Domain Database (<http://www.ncbi.nlm.nih.gov/RefSeq/>, [31]); DI, digenic inheritance; FEVR, familial exudative vitreoretinopathy; NA, not applicable; NL, not listed; ROP, retinopathy of prematurity; SP, sporadic.

\* Based on the recommendation of the American College of Medical Genetics and Genomics (ACMG) standard and guidelines [32].

§ Affected sibs without parents' genotype and phenotype.
