# Supplementary material for: Familial Exudative Vitreoretinopathy With and Without Pathogenic Variants of Norrin/β-Catenin Signaling Genes
Source: PubMed Central journal article supplement — Ophthalmol Sci. 2024 Mar 15;4(5):100514. doi: 10.1016/j.xops.2024.100514 (PMC11179410; doi:10.1016/j.xops.2024.100514), 2024-03-15
Supplement: mmc2.pdf [file mmc2.pdf]

**Table S2. Pathogenic variants in the *LRP5* gene**

| Nucleotide change | Amino acid change | N. of families identified in this study | Minor allele frequency |           |                       | <i>In-silico</i> prediction |              |            |              |                        |           | Conserved domain                  | Associated phenotype | Known variant [reported in our earlier study] | Pathogenicity (evidenced criteria)*         |
|-------------------|-------------------|-----------------------------------------|------------------------|-----------|-----------------------|-----------------------------|--------------|------------|--------------|------------------------|-----------|-----------------------------------|----------------------|-----------------------------------------------|---------------------------------------------|
|                   |                   |                                         | gnomA D [27]           | HGVD [28] | TOMMO 3.5kJPN v2 [29] | GERP++ [33]                 | SIFT [34]    | M-CAP [35] | REVEL [36]   | Polyphen 2 HumDIV [37] | CADD [38] |                                   |                      |                                               |                                             |
| c.121C>T          | p.R41W            | 1                                       | NL                     | NL        | NL                    | 3.31                        | 0.023        | 0.427      | 0.717        | 1.000                  | 23.6      | BP1                               | FEVR(AR)             | Yes                                           | Likely pathogenic (PM1+PM2+PM3+PP2+PP3)     |
| c.362A>G          | p.K121R           | 3                                       | NL                     | NL        | NL                    | 3.71                        | 0.005        | 0.238      | 0.760        | 1.000                  | 24.9      | (CDD: 158893)                     | FEVR(AD)             | No                                            | Likely pathogenic (PM1+PM2+PM3+PP1+PP2+PP3) |
| c.433C>T          | p.L145F           | 4                                       | NL                     | NL        | NL                    | 3.71                        | 0.002        | 0.587      | 0.853        | 0.999                  | 23.2      | BP1                               | FEVR(AD/AR )         | [22]                                          | Likely pathogenic (PM1+PM2+PM3+PP1+PP2+PP3) |
| c.556C>T          | p.R186W           | 1                                       | NL                     | NL        | NL                    | 3.56                        | 0.000        | 0.805      | 0.852        | 1.000                  | 27.6      | (CDD: 158893)                     | FEVR(SP)             | No                                            | Likely pathogenic (PM1+PM2+PP2+PP3)         |
| c.803_812del      | p.G269Rfs *4      | 1                                       | NL                     | NL        | NL                    | NL                          | NL           | NL         | NL           | NL                     | NA        | NL                                | FEVR(AD/AR )         | [22]                                          | Pathogenic (PVS1+PM2+PM3)                   |
| c.871C>T          | p.R291W           | 1                                       | NL                     | NL        | NL                    | NL                          | 0.003        | 0.702      | 0.785        | 1.000                  | 26.8      | adjacent to LDL-receptor class B5 | FEVR(SP)             | Yes                                           | Pathogenic (PS1+PM1+PM2+PP2+PP3)            |
| c.961T>C          | p.C321R           | 1                                       | NL                     | NL        | NL                    | 3.85                        | 0.000        | 1.000      | 0.905        | 1.000                  | 23.6      | NA                                | FEVR(AR)             | No                                            | Likely pathogenic (PM2+PM3+PP2+PP3)         |
| c.1021G>A         | p.E341K           | 1                                       | NL                     | NL        | NL                    | 3.85                        | <u>0.207</u> | 1.000      | <u>0.000</u> | 0.077                  | 22.7      | BP2                               | FEVR(AR)             | No                                            | Likely pathogenic                           |

|             |         |   |        |        |        |      |       |       |       |       |      |               |             |           |                                                 |                   |
|-------------|---------|---|--------|--------|--------|------|-------|-------|-------|-------|------|---------------|-------------|-----------|-------------------------------------------------|-------------------|
|             |         |   |        |        |        |      |       |       |       |       |      |               |             |           |                                                 | (PM1+PM2+PM3+PP2) |
| c.1145C>T   | p.P382L | 3 | NL     | 0.0008 | 0.0001 | 3.81 | 0.002 | 0.964 | 0.936 | 0.998 | 25.8 | (CDD: 158893) | FEVR(AD/AR) | Yes       | Pathogenic<br>(PS1+PM1+PM2+PM3+PP1+PP2+PP3)     |                   |
| c.1270G>A   | p.D424N | 1 | NL     | NL     | NL     | 3.85 | 0.000 | 1.000 | 0.952 | 1.000 | 25.4 | (CDD: 158893) | FEVR(AR)    | Yes       | Pathogenic<br>(PS1+PM1+PM2+PM3+PM5+PP2+PP3)     |                   |
| c.1282C>T   | p.R428* | 1 | NL     | NL     | NL     | 2.94 | NA    | NA    | NA    | NA    | 38.0 | NA            | FEVR(AD)    | Yes: OPPG | Pathogenic<br>(PVS1+PS1+PM2+PP1)                |                   |
| c.1321G>A   | p.E441K | 1 | 0.0000 | NL     | NL     | 2.99 | 0.005 | 0.603 | 0.844 | 0.999 | 26.3 | (CDD: 158893) | FEVR(AD)    | Yes       | Pathogenic<br>(PS1+PM1+PM2+PP1+PP2+PP3)         |                   |
| c.1330C>T   | p.R444C | 1 | NL     | NL     | NL     | 3.94 | 0.000 | 0.773 | 0.800 | 0.882 | 24.5 | (CDD: 158893) | FEVR(DI)    | [22]      | Pathogenic<br>(PS1+PS3+PM1+PM2+PM5+PP1+PP2+PP3) |                   |
| c.1333C>T   | p.L445F | 1 | NL     | NL     | NL     | 3.94 | 0.002 | 1.000 | 0.779 | 1.000 | 24.9 | (CDD: 158893) | FEVR(AR)    | Yes       | Likely pathogenic<br>(PM1+PM2+PM3+PP2+PP3)      |                   |
| c.1412+1G>A | -       | 1 | NL     | NL     | NL     | 3.94 | NA    | NA    | NA    | NA    | 33.0 | NA            | FEVR(AR)    | No        | Likely pathogenic<br>(PVS1+PM2)                 |                   |
| c.1433G>A   | p.W478* | 1 | NL     | NL     | NL     | 3.3  | NA    | NA    | NA    | NA    | 42.0 | NA            | FEVR(AR)    | Yes       | Pathogenic<br>(PVS1+PS1+PM2+PP1)                |                   |

|           |         |   |    |        |        |      |       |       |              |              |      |                   |          |      |                                                         |
|-----------|---------|---|----|--------|--------|------|-------|-------|--------------|--------------|------|-------------------|----------|------|---------------------------------------------------------|
| c.1564G>A | p.A522T | 1 | NL | NL     | NL     | 3.28 | 0.002 | 0.706 | 0.906        | 0.997        | 27.1 | (CDD::<br>158893) | FEVR(AD) | [22] | Pathogenic<br>(PS1+PS3+PM1+P<br>M2+PM5+PP1+PP<br>2+PP3) |
| c.1604C>T | p.T535M | 1 | NL | NL     | 0.0040 | 4.13 | 0.001 | 0.530 | 0.769        | 1.000        | 24.2 | (CDD:<br>158893)  | FEVR(AR) | [22] | Pathogenic<br>(PS1+PM1+PM2+<br>PM3+PP2+PP3)             |
| c.1828G>A | p.G610R | 1 | NL | NL     | NL     | 4.11 | 0.000 | 0.784 | 0.962        | 1.000        | 24.5 | NA                | FEVR(AR) | [22] | Likely pathogenic<br>(PM2+PM3+PM5+<br>PP2+PP3)          |
| c.1850T>G | p.F617C | 1 | NL | NL     | NL     | 4.11 | 0.001 | 0.856 | 0.958        | 0.966        | 27.5 | NA                | FEVR(AR) | [22] | Likely pathogenic<br>(PM2+PM3+PP2+<br>PP3)              |
| c.1873T>C | p.C625R | 1 | NL | NL     | NL     | 4.11 | 0.000 | 1.000 | 0.979        | 1.000        | 26.3 | NA                | FEVR(AR) | No   | Likely pathogenic<br>(PM2+PM3+PP2+<br>PP3)              |
| c.1888G>A | p.G630S | 1 | NL | NL     | NL     | 4.11 | 0.009 | 0.750 | 0.961        | 1.000        | 27.5 | NA                | FEVR(AR) | No   | Likely pathogenic<br>(PM2+PM3+PP2+<br>PP3)              |
| c.1985C>T | p.T662I | 1 | NL | NL     | NL     | 4.11 | 0.009 | 0.421 | 0.726        | <u>0.641</u> | 23.8 | BP3               | FEVR(DI) | No   | Likely pathogenic<br>(PM1+PM2+PM3+<br>PP2+PP3)          |
| c.1994A>G | p.N665S | 1 | NL | 0.0013 | 0.0003 | 2.97 | 0.020 | 0.118 | <u>0.333</u> | <u>0.000</u> | 18.5 | BP3               | FEVR(SP) | No   | Likely pathogenic<br>(PM1+PM2+PP2+<br>PP3)              |
| c.2227G>A | p.E743K | 1 | NL | NL     | NL     | 4.53 | 0.002 | 1.000 | 0.834        | 1.000        | 32.0 | (CDD:<br>158893)  | FEVR(AR) | No   | Likely pathogenic<br>(PM1+PM2+PM3+<br>PP2+PP3)          |

|           |          |   |        |        |        |      |              |       |              |              |      |                  |                 |           |                                                |
|-----------|----------|---|--------|--------|--------|------|--------------|-------|--------------|--------------|------|------------------|-----------------|-----------|------------------------------------------------|
| c.2254C>T | p.R752W  | 1 | NL     | NL     | NL     | 3.54 | 0.000        | 1.000 | 0.996        | 1.000        | 31.0 | (CDD:<br>158893) | FEVR(AD)        | Yes       | Pathogenic<br>(PS1+PM1+PM2+<br>PM5+PP2+PP3)    |
| c.2392A>G | p.T798A  | 2 | NL     | 0.0014 | 0.0006 | 4.5  | <u>0.063</u> | 0.144 | 0.784        | <u>0.074</u> | 22.4 | BP3              | FEVR(AR/SP<br>) | [22]      | Likely pathogenic<br>(PM1+PM2+PP2+<br>PP3)     |
| c.2783G>A | p.C928Y  | 1 | NL     | NL     | NL     | 5.02 | 0.000        | 0.644 | 0.953        | 1.000        | 27.4 | -                | FEVR(AR)        | No        | Likely pathogenic<br>(PM2+PM3+PP2+<br>PP3)     |
| c.2973C>G | p.I991M  | 2 | NL     | 0.0014 | 0.0008 | 3.76 | 0.003        | 0.202 | <u>0.421</u> | <u>0.003</u> | 22.8 | (CDD:<br>158893) | FEVR(AD/SP<br>) | No        | Likely pathogenic<br>(PM1+PM2+PP1+<br>PP2+PP3) |
| c.3232C>T | p.R1078* | 1 | NL     | 0.0034 | NL     | 2.74 | NA           | NA    | NA           | NA           | 40.0 | NA               | FEVR(AD)        | Yes       | Pathogenic<br>(PVS1+PS1+PM2+<br>PP1)           |
| c.3280G>A | p.E1094K | 1 | NL     | NL     | NL     | 4.93 | 0.066        | 1.000 | 0.825        | 1.000        | 26.1 | BP4              | FEVR(AR)        | Yes: OPPG | Pathogenic<br>(PS1+PM1+PM2+<br>PM3+PP2+PP3)    |
| c.3361A>G | p.N1121D | 4 | 0.0004 | 0.0046 | 0.0041 | 4.93 | <u>0.163</u> | NA    | 0.608        | 0.415        | 22.6 | (CDD:<br>158893) | FEVR(AD/DI)     | [22]      | Pathogenic<br>(PS1+PM1+PM2+<br>PM3+PP1+PP2)    |
| c.3569G>A | p.R1190H | 1 | NL     | NL     | NL     | 3.72 | <u>0.070</u> | 0.180 | <u>0.468</u> | 0.896        | 17.3 | BP4              | FEVR(AR)        | No        | Likely pathogenic<br>(PM1+PM2+PM3+<br>PP2+PP3) |
| c.3877G>A | p.E1293K | 1 | NL     | NL     | NL     | 4.39 | <u>0.810</u> | 0.126 | <u>0.300</u> | <u>0.001</u> | 22.1 | (CDD:<br>29012)  | FEVR(AR)        | No        | Likely pathogenic<br>(PM1+PM2+PM3+<br>PP2)     |
| c.4042T>C | p.C1348R | 2 | 0.0000 | NL     | NL     | 4.37 | 0.001        | 0.925 | 0.981        | 1.000        | 29.0 | (CDD:            | FEVR(AR)        | No        | Likely pathogenic                              |

|                |                  |   |        |        |        |      |              |       |              |              |      |             |             |          |                                         |
|----------------|------------------|---|--------|--------|--------|------|--------------|-------|--------------|--------------|------|-------------|-------------|----------|-----------------------------------------|
|                |                  |   |        |        |        |      |              |       |              |              |      | 29012)      |             |          | (PM1+PM2+PM3+PP2)                       |
| c.4001-1G>C    | -                | 1 | NL     | NL     | NL     | 4.37 | NA           | NA    | NA           | NA           | 35.0 | NA          | FEVR(SP)    | No       | Likely pathogenic (PVS1+PM2)            |
| c.4148A>C      | p.H1383P         | 1 | NL     | 0.0021 | 0.0011 | 4.53 | <u>0.367</u> | 0.380 | <u>0.476</u> | <u>0.001</u> | 19.2 | NA          | FEVR(AD/SP) | Yes: ROP | Likely pathogenic (PS1+PM2+PP1+P2+PP4)  |
| c.4454_4465del | p.S1485_S1488del | 1 | NL     | NL     | NL     | NL   | NA           | NA    | NA           | NA           | NA   | NA          | FEVR(AD)    | No       | Likely pathogenic (PM2+PM4+PP1+PP2)     |
| c.4457C>A      | p.S1486*         | 1 | NL     | NL     | NL     | 4.76 | NA           | NA    | NA           | NA           | 51.0 | NA          | FEVR(AR)    | No       | Pathogenic (PVS1+PM2+PM3+PP1)           |
| c.4488G>A      | p.P1496=         | 1 | NL     | NL     | NL     | 3.84 | NA           | NA    | NA           | NA           | 24.9 | NA          | FEVR(SP)    | No       | Likely pathogenic (PVS1+PM2)            |
| c.4643G>T      | p.C1548F         | 1 | 0.0002 | 0.0040 | 0.0008 | 4.73 | 0.050        | 0.295 | 0.842        | 0.999        | 25.1 | NA          | FEVR(AD)    | Yes      | Likely pathogenic (PS3+PM2+PP2+P3)      |
| c.4835C>A      | p.T1612K         | 1 | NL     | NL     | NL     | 4.53 | 0.000        | 0.741 | 0.600        | 1.000        | 24.5 | PPPSP motif | FEVR(AR)    | No       | Likely pathogenic (PM1+PM2+PM3+PP2+PP3) |

Underlined values are classified as "not deleterious" according to the cutoff values ([33]-[37]), AD, autosomal dominant; AR, autosomal recessive; BP, beta-propeller; CDD, Conserved Domain Database (<http://www.ncbi.nlm.nih.gov/RefSeq/>, [31]); DI, digenic inheritance; FEVR, familial exudative vitreoretinopathy; NA, not applicable; NL, not listed; OPPG, osteoporosis-pseudoglioma syndrome; ROP, retinopathy of prematurity; SP, sporadic.

\* Based on the recommendation of the American College of Medical Genetics and Genomics (ACMG) standard and guidelines [32].
