# Supplementary material for: Familial Exudative Vitreoretinopathy With and Without Pathogenic Variants of Norrin/β-Catenin Signaling Genes
Source: PubMed Central journal article supplement — Ophthalmol Sci. 2024 Mar 15;4(5):100514. doi: 10.1016/j.xops.2024.100514 (PMC11179410; doi:10.1016/j.xops.2024.100514), 2024-03-15
Supplement: mmc3.pdf [file mmc3.pdf]

**Table S3. Pathogenic variants in *TSPAN12* gene**

| Nucleotide change | Amino acid change | N. of families identified in this study | Minor allele frequency |           |                       | <i>In-silico</i> prediction |           |            |              |                        |           | Conserved domain | Associated phenotype | Known variant [reported in our earlier study] | Pathogenicity (evidenced criteria)*     |
|-------------------|-------------------|-----------------------------------------|------------------------|-----------|-----------------------|-----------------------------|-----------|------------|--------------|------------------------|-----------|------------------|----------------------|-----------------------------------------------|-----------------------------------------|
|                   |                   |                                         | gnomA D [27]           | HGVD [28] | TOMMO 3.5kJPN v2 [29] | GERP++ [33]                 | SIFT [34] | M-CAP [35] | REVEL [36]   | Polyphen 2 HumDIV [37] | CADD [38] |                  |                      |                                               |                                         |
| c.194C>T          | p.P65L            | 1                                       | NL                     | NL        | NL                    | 5.99                        | 0.02      | 0.053      | <u>0.387</u> | 0.386                  | 22.9      | (CDD: 189507)    | FEVR(DI)             | Yes                                           | Likely pathogenic (PM1+PM2+PP2+PP3)     |
| c.232G>A          | p.G78R            | 1                                       | NL                     | NL        | NL                    | 5.99                        | 0         | 0.260      | 0.710        | 0.996                  | 29.8      | (CDD: 189507)    | FEVR(AD)             | Yes                                           | Pathogenic (PS1+PM1+PM2+PP1+PP2+PP3)    |
| c.282A>G          | p.A94=            | 1                                       | NL                     | NL        | NL                    | NL                          | NA        | NA         | NA           | NA                     | 15.5      | NA               | FEVR(DI)             | No                                            | Likely pathogenic (PVS1+PM2)            |
| c.338G>A          | p.W113*           | 1                                       | NL                     | NL        | NL                    | 5.25                        | NA        | NA         | NA           | NA                     | 50.0      | NA               | FEVR(SP)             | No                                            | Likely pathogenic (PVS1+PM2)            |
| c.380_385dup      | p.D127_M128dup    | 1                                       | NL                     | NL        | NL                    | NL                          | NA        | NA         | NA           | NA                     | NA        | NA               | FEVR(AD)             | No                                            | Likely pathogenic (PM1+PM2+PM4+PP1)     |
| c.402G>C          | p.R134S           | 1                                       | NL                     | NL        | NL                    | 2.34                        | 0         | 0.039      | <u>0.404</u> | 0.014                  | 22.4      | (CDD: 48421)     | FEVR(AD)             | No                                            | Likely pathogenic (PM1+PM2+PP1+PP2+PP3) |
| c.419T>A          | p.L140*           | 6                                       | NL                     | NL        | NL                    | 5.89                        | NA        | NA         | NA           | NA                     | 37.0      | NA               | FEVR(AD/SP)          | [24]                                          | Pathogenic (PVS1+PM2+PP1)               |
| c.644delG         | p.R215Kfs*9       | 1                                       | NL                     | NL        | NL                    | NL                          | NA        | NA         | NA           | NA                     | -         | NA               | FEVR(AD)             | No                                            | Pathogenic (PVS1+PM1+PM2+PP1)           |
| c.734T>C          | p.L245P           | 1                                       | 0.0000                 | NL        | NL                    | 5.68                        | 0         | 0.066      | 0.545        | 0.997                  | 28.4      | adjacent to      | FEVR(AD)             | [24]                                          | Likely pathogenic                       |

|          |         |   |    |    |    |      |    |    |    |    |      |                  |          |     |  |                                      |
|----------|---------|---|----|----|----|------|----|----|----|----|------|------------------|----------|-----|--|--------------------------------------|
|          |         |   |    |    |    |      |    |    |    |    |      | (CDD:<br>189507) |          |     |  | (PM1+PM2+PP1+PP<br>2+PP3)            |
| c.738G>A | p.W246* | 1 | NL | NL | NL | 5.68 | NA | NA | NA | NA | 40.0 | NA               | FEVR(AD) | Yes |  | Pathogenic<br>(PVS1+PS1+PM2+P<br>P1) |

Underlined values are classified as "not deleterious" according to the cutoff values ([33]-[37]), AD, autosomal dominant; CDD, Conserved Domain Database (<http://www.ncbi.nlm.nih.gov/RefSeq/>, [31]); DI, digenic inheritance; FEVR, familial exudative vitreoretinopathy; NA, not applicable; NL, not listed; SP, sporadic.

\* Based on the recommendation of the American College of Medical Genetics and Genomics (ACMG) standard and guidelines [32].
