# Supplementary material for: Familial Exudative Vitreoretinopathy With and Without Pathogenic Variants of Norrin/β-Catenin Signaling Genes
Source: PubMed Central journal article supplement — Ophthalmol Sci. 2024 Mar 15;4(5):100514. doi: 10.1016/j.xops.2024.100514 (PMC11179410; doi:10.1016/j.xops.2024.100514), 2024-03-15
Supplement: mmc4.pdf [file mmc4.pdf]

**Table S4. Pathogenic variants in *NDP* gene**

| Nucleotide change | Amino acid change | N. of families identified in this study | Minor allele frequency |      |                 | <i>In-silico</i> prediction |              |       |       |              |      | Conserved domain | Associated phenotype | Known variant [reported in our earlier study] | Pathogenicity (evidenced criteria)*  |                           |
|-------------------|-------------------|-----------------------------------------|------------------------|------|-----------------|-----------------------------|--------------|-------|-------|--------------|------|------------------|----------------------|-----------------------------------------------|--------------------------------------|---------------------------|
|                   |                   |                                         | gnomA                  | HGVD | TOMMO           | GERP                        | SIFT         | M-CAP | REVEL | Polyphen2    | CADD |                  |                      |                                               |                                      |                           |
|                   |                   |                                         | D [27]                 | [28] | 3.5kJPN v2 [29] | ++ [33]                     | [34]         | [35]  | [36]  | HumDIV [37]  | [38] |                  |                      |                                               |                                      |                           |
| c.11_12del        | p.H4Rfs*21        | 1                                       | NL                     | NL   | NL              | NL                          | NA           | NA    | NA    | NA           | NA   | NA               | NA                   | ND                                            | Yes                                  | Pathogenic (PVS1+PS1+PM2) |
| c.53T>A           | p.I18K            | 1                                       | NL                     | NL   | NL              | 5.810                       | 0.030        | 0.714 | 0.670 | <u>0.008</u> | 23.4 | signal sequence  | FEVR(DI)             | [23]                                          | Likely pathogenic (PM1+PM2+PP2+PP3)  |                           |
| c.88_104del       | p.F30Pfs*21       | 1                                       | NL                     | NL   | NL              | NL                          | NA           | NA    | NA    | NA           | NA   | NA               | ND                   | No                                            | Likely pathogenic (PVS1+PM2)         |                           |
| c.112C>T          | p.R38C            | 1                                       | NL                     | NL   | NL              | 5.810                       | 0.000        | 0.968 | 0.730 | 0.999        | 28.3 | NA               | ND                   | Yes                                           | Likely pathogenic (PS1+PM2+PP2+PP3)  |                           |
| c.162G>C          | p.K54N            | 2                                       | NL                     | NL   | NL              | 2.820                       | <u>0.220</u> | 0.122 | 0.520 | 0.999        | 23.1 | (CDD: 153492)    | FEVR(XL)             | [23]                                          | Pathogenic (PS1+PS3+PM1+PM2+PP2+PP3) |                           |
| c.175-1G>A        | -                 | 1                                       | NL                     | NL   | NL              | 5.960                       | NA           | NA    | NA    | NA           | 35.0 | NA               | ND                   | [23]                                          | Pathogenic (PVS1+PM2+PP3)            |                           |
| c.194G>A          | p.C65Y            | 1                                       | NL                     | NL   | NL              | 5.960                       | 0.000        | 0.862 | 0.916 | 0.997        | 29.3 | (CDD: 153492)    | ND                   | [23]                                          | Pathogenic (PS1+PM1+PM2+PM5+PP2+PP3) |                           |
| c.290G>C          | p.R97P            | 1                                       | NL                     | NL   | NL              | 5.960                       | 0.000        | 0.893 | 0.841 | 0.999        | 32.0 | (CDD: 153492)    | ND                   | [23]                                          | Pathogenic (PS1+PM1+PM2+PM5+PP2+PP3) |                           |
| c.295_300del      | p.Q99_T100del     | 1                                       | NL                     | NL   | NL              | NL                          | NA           | NA    | NA    | NA           | NA   | (CDD: 153492)    | ND                   | No                                            | Likely pathogenic (PM1+PM2+PM4)      |                           |
| c.334_340del      | p.G112Cfs*148     | 1                                       | NL                     | NL   | NL              | NL                          | NA           | NA    | NA    | NA           | NA   | NA               | ND                   | No                                            | Likely pathogenic                    |                           |

|          |         |   |    |    |    |       |       |       |       |       |      |               |              | (PVS1+PM2) |                                            |
|----------|---------|---|----|----|----|-------|-------|-------|-------|-------|------|---------------|--------------|------------|--------------------------------------------|
| c.344G>T | p.R115L | 2 | NL | NL | NL | 5.960 | 0.050 | 0.882 | 0.784 | 0.997 | 26.7 | (CDD: 153492) | FEVR(XL/SP ) | [23]       | Pathogenic<br>(PS3+PM1+PM2+PM5+PP2+PP3)    |
| c.376T>G | p.C126G | 1 | NL | NL | NL | 5.960 | 0.000 | 0.847 | 0.886 | 0.997 | 26.8 | (CDD: 153492) | ND           | No         | Likely pathogenic<br>(PM1+PM2+PM5+PP2+PP3) |

Underlined values are classified as "not deleterious" according to the cutoff values ([33]-[37]); CDD, Conserved Domain Database (<http://www.ncbi.nlm.nih.gov/RefSeq/>, [31]); DI, digenic inheritance; FEVR, familial exudative vitreoretinopathy; NA, not applicable; ND, Norrie disease; NL, not listed; SP, sporadic; XL, X-linked.

\* Based on the recommendation of the American College of Medical Genetics and Genomics (ACMG) standard and guidelines [32].
