# Supplementary material for: Familial Exudative Vitreoretinopathy With and Without Pathogenic Variants of Norrin/β-Catenin Signaling Genes
Source: PubMed Central journal article supplement — Ophthalmol Sci. 2024 Mar 15;4(5):100514. doi: 10.1016/j.xops.2024.100514 (PMC11179410; doi:10.1016/j.xops.2024.100514), 2024-03-15
Supplement: mmc5.pdf [file mmc5.pdf]

**Table S11. Stage of all eyes between probands with or without pathogenic variants of the Norrin/ $\beta$ -catenin genes**

|                   | Probands with variants<br>in the Norrin/ $\beta$ -catenin<br>genes (n = 108) | Probands without<br>variants in the Norrin/ $\beta$ -<br>catenin gene (n = 173) | <i>P</i> |
|-------------------|------------------------------------------------------------------------------|---------------------------------------------------------------------------------|----------|
| Stage of all eyes |                                                                              |                                                                                 |          |
| Stage 0           | 2 ( 0.9%)                                                                    | 5 (1.4%)                                                                        | 0.7128¶  |
| Stage 1           | 47 (21.8%)                                                                   | 134 (38.7%)                                                                     | <0.0001¶ |
| Stage 2           | 6 (2.8%)                                                                     | 21 (6.1%)                                                                       | 0.1034¶  |
| Stage 3           | 51 (23.6%)                                                                   | 31 (9.0%)                                                                       | <0.0001¶ |
| Stage 4           | 69 (31.9%)                                                                   | 86 (24.9%)                                                                      | 0.0806¶  |
| Stage 5           | 32 (14.8%)                                                                   | 33 (9.5%)                                                                       | 0.0592¶  |
| Stage R           | 9 (4.2%)                                                                     | 36 (10.4%)                                                                      | 0.0099¶  |

¶A result from a 2 X 2 comparison between the target stage and other stages.
