# Supplementary material for: Familial Exudative Vitreoretinopathy With and Without Pathogenic Variants of Norrin/β-Catenin Signaling Genes
Source: PubMed Central journal article supplement — Ophthalmol Sci. 2024 Mar 15;4(5):100514. doi: 10.1016/j.xops.2024.100514 (PMC11179410; doi:10.1016/j.xops.2024.100514), 2024-03-15
Supplement: mmc6.pdf [file mmc6.pdf]

**Table S13. Stage of all eyes in the 108 variant-positive probands with FEVR**

|                   | <i>FZD4</i><br>n = 78 | <i>LRP5</i><br>n = 76 | <i>TSPAN12</i><br>n = 26 | <i>NDP</i><br>n = 26 | Di-genic<br>n = 10 | Total<br>n = 216 |
|-------------------|-----------------------|-----------------------|--------------------------|----------------------|--------------------|------------------|
| Stage of all eyes |                       |                       |                          |                      |                    |                  |
| Stage 0           | 0<br>(0%)             | 2<br>(2.6%)           | 0<br>(0%)                | 0<br>(0%)            | 0<br>(0%)          | 2<br>(0.9%)      |
| Stage 1           | 21<br>(26.9%)         | 13<br>(17.1%)         | 9<br>(34.6%)             | 1<br>(3.8%)          | 2<br>(20.0%)       | 46<br>(21.3%)    |
| Stage 2           | 4<br>(5.1%)           | 2<br>(2.6%)           | 0<br>(0%)                | 0<br>(0%)            | 0<br>(0%)          | 6<br>(2.8%)      |
| Stage 3           | 20<br>(25.6%)         | 16<br>(21.1%)         | 6<br>(23.1%)             | 7<br>(26.9%)         | 2<br>(20.0%)       | 51<br>(23.6%)    |
| Stage 4           | 25<br>(31.1%)         | 30<br>(39.5%)         | 7<br>(26.9%)             | 3<br>(11.5%)         | 4<br>(40.0%)       | 69<br>(31.9%)    |
| Stage 5           | 4<br>(5.1%)           | 10<br>(13.2%)         | 2<br>(7.7%)              | 15<br>(57.7%)        | 2<br>(20.0%)       | 33<br>(15.3%)    |
| Stage R           | 4<br>(5.1%)           | 3<br>(3.9%)           | 2<br>(7.7%)              | 0<br>(0%)            | 0<br>(0%)          | 9<br>(4.2%)      |
