# Supplementary material for: Familial Exudative Vitreoretinopathy With and Without Pathogenic Variants of Norrin/β-Catenin Signaling Genes
Source: PubMed Central journal article supplement — Ophthalmol Sci. 2024 Mar 15;4(5):100514. doi: 10.1016/j.xops.2024.100514 (PMC11179410; doi:10.1016/j.xops.2024.100514), 2024-03-15
Supplement: mmc7.pdf [file mmc7.pdf]

**Table S14. Genetic and clinical characteristics of the 108 variant-positive probands with FEVR (AD- and AR- variants in *LRP5* gene separated)**

|                        | <i>FZD4</i>       | <i>AD-LRP5</i>    | <i>AR-LRP5</i>    | <i>TSPAN12</i>    | <i>NDP</i>        | Di-genic        |
|------------------------|-------------------|-------------------|-------------------|-------------------|-------------------|-----------------|
|                        | n = 39<br>(36.1%) | n = 25<br>(23.1%) | n = 13<br>(27.8%) | n = 13<br>(27.8%) | n = 13<br>(27.8%) | n = 5<br>(4.6%) |
| Male                   | 20<br>(51.3%)     | 13<br>(52.0%)     | 7<br>(53.8%)      | 9<br>(69.2%)      | 13<br>(100.0%)    | 4<br>(80.0%)    |
| Female                 | 19<br>(48.7%)     | 12<br>(48.0%)     | 6<br>(46.2%)      | 4<br>(30.8%)      | 0<br>(0.0%)       | 1<br>(20.0%)    |
| Familial               | 31<br>(79.5%)     | 15<br>(60.0%)     | 5<br>(38.5%)      | 11<br>(84.6%)     | 5<br>(38.5%)      | 2<br>(40.0%)    |
| Sporadic               | 8<br>(20.5%)      | 10<br>(40.0%)     | 8<br>(61.5%)      | 2<br>(15.4%)      | 8<br>(61.5%)      | 3<br>(60.0%)    |
| Infantile case         | 29<br>(74.4%)     | 16<br>(64.0%)     | 11<br>(84.6%)     | 9<br>(69.2%)      | 11<br>(84.6%)     | 5<br>(100.0%)   |
| Juvenile or adult case | 10<br>(25.6%)     | 9<br>(36.0%)      | 2<br>(15.4%)      | 4<br>(30.8%)      | 2<br>(15.4%)      | 0<br>(0.0%)     |
| Syndromic              | 1<br>(2.6%)       | 1<br>(4.0%)       | 1<br>(7.7%)       | 0<br>(0.0%)       | 8<br>(61.5%)      | 0<br>(0.0%)     |
| Non-syndromic          | 38<br>(97.4%)     | 24<br>(96.0%)     | 12<br>(92.3%)     | 13<br>(100%)      | 5<br>(38.5%)      | 5<br>(100.0%)   |
| Symmetry*              | 19<br>(48.7%)     | 12<br>(48.0%)     | 7<br>(53.8%)      | 6<br>(46.2%)      | 10 (76.9%)        | 0<br>(0.0%)     |
| Asymmetry*             | 20<br>(51.3%)     | 13<br>(52.0%)     | 6<br>(46.6%)      | 7<br>(53.8%)      | 3<br>(23.1%)      | 5<br>(100.0%)   |

| Stage of more severe eye |               |               |              |              |              |              |
|--------------------------|---------------|---------------|--------------|--------------|--------------|--------------|
| Stage 1                  | 2<br>(5.1%)   | 2<br>(8.0%)   | 0<br>(0%)    | 2<br>(15.4%) | 0<br>(0%)    | 0<br>(0%)    |
| Stage 2                  | 2<br>(5.1%)   | 1<br>(4.0%)   | 0<br>(0%)    | 0<br>(0%)    | 0<br>(0%)    | 0<br>(0%)    |
| Stage 3                  | 9<br>(23.1%)  | 4<br>(16.0%)  | 3<br>(23.1%) | 2<br>(15.4%) | 3<br>(23.1%) | 0<br>(0%)    |
| Stage 4                  | 18<br>(46.2%) | 10<br>(40.0%) | 6<br>(46.2%) | 5<br>(38.5%) | 2<br>(15.4%) | 3<br>(60.0%) |
| Stage 5                  | 4<br>(10.3%)  | 5<br>(20.0%)  | 4<br>(30.8%) | 2<br>(15.4%) | 8<br>(61.5%) | 2<br>(40.0%) |
| Stage R                  | 4<br>(10.3)   | 3<br>(12.0%)  | 0<br>(0%)    | 2<br>(15.4%) | 0<br>(0%)    | 0<br>(0%)    |

AD, autosomal dominant; AR autosomal recessive; R, rhegmatogenous retinal detachment. \*R was assigned to the original stage.
