# Supplementary material for: Familial Exudative Vitreoretinopathy With and Without Pathogenic Variants of Norrin/β-Catenin Signaling Genes
Source: PubMed Central journal article supplement — Ophthalmol Sci. 2024 Mar 15;4(5):100514. doi: 10.1016/j.xops.2024.100514 (PMC11179410; doi:10.1016/j.xops.2024.100514), 2024-03-15
Supplement: mmc8.pdf [file mmc8.pdf]

**Table S15. Familial predisposition of the patients with two-clustered genes**

|          | <i>FZD4/ TSPAN12/ AD-LRP5</i> | <i>AR-LRP5 / NDP / Di-genic</i> | <i>P</i> |
|----------|-------------------------------|---------------------------------|----------|
| Familial | 57 (74.0%)                    | 12 (38.7%)                      |          |
| Sporadic | 20 (26.0%)                    | 19 (61.3%)                      | 0.0008   |

AD, autosomal dominant; AR autosomal recessive
