# Supplementary material for: Familial Exudative Vitreoretinopathy With and Without Pathogenic Variants of Norrin/β-Catenin Signaling Genes
Source: PubMed Central journal article supplement — Ophthalmol Sci. 2024 Mar 15;4(5):100514. doi: 10.1016/j.xops.2024.100514 (PMC11179410; doi:10.1016/j.xops.2024.100514), 2024-03-15
Supplement: mmc9.pdf [file mmc9.pdf]

**Table S16. Pathogenicity assessment of more common pathogenic variants in the Norrin/ $\beta$ -catenin gene**

| Gene        | Nucleotide change | Amino acid change | N. of families identified in this study | Minor allele frequency |           |                       | <i>In-silico</i> prediction |           |            |             |                        |           | Conserved domain | Known variant [reported in our earlier study] | Pathogenicity (evidenced criteria)*  |
|-------------|-------------------|-------------------|-----------------------------------------|------------------------|-----------|-----------------------|-----------------------------|-----------|------------|-------------|------------------------|-----------|------------------|-----------------------------------------------|--------------------------------------|
|             |                   |                   |                                         | gnomAD [27]            | HGVD [28] | TOMMO 3.5kJPN v2 [29] | GERP ++ [33]                | SIFT [34] | M-CAP [35] | REVE L [36] | Polyphen 2 HumDIV [37] | CADD [38] |                  |                                               |                                      |
| <i>FZD4</i> | c.205C>T          | p.H69Y            | 18¶                                     | 0.0004                 | 0.0139    | 0.0096                | 4.80                        | 0.020     | 0.125      | 0.663       | <u>0.197</u>           | 24.2      | (CDD:143557)     | [21, 66]                                      | Pathogenic (PS1+PS3+PS4+PM1+PP2+PP3) |
| <i>LRP5</i> | c.4619C>T         | p.T1540M          | 8§                                      | 0.0001                 | 0.0142    | 0.0128                | 3.81                        | 0.004     | 0.447      | 0.538       | 1.000                  | 22.9      | PPPSP motif      | [22, 66]                                      | Likely pathogenic (PS3+PM1+PP2+PP3)  |

\* Based on the recommendation of the American College of Medical Genetics and Genomics (ACMG) standard and guidelines (2015) [37]. Underlined values are indicated as "not deleterious" according to the cutoff values.

¶ Found in 4 familial and 8 sporadic cases heterozygously, and in 6 probands through compound heterozygous transmission with variants in the *FZD4* or *LRP5* gene (including 2 p.T1540M variant).

§ Found in 2 familial and 2 sporadic FEVR cases, and in 4 families through compound heterozygous transmission with variants in the *LRP5* or *FZD4* gene (including 2 p.H69Y variant).

CDD, Conserved Domain Database (<http://www.ncbi.nlm.nih.gov/RefSeq/>, [38]).
